# Supplementary material
Source: publisher figshare collection journal article supplement (https://acs.figshare.com/ndownloader/files/17711015)
Supplement: Supplementary file 1 [file 17711015]

## Appendix

### A1- Quality certificate of diesel used in oxygenated study

#### CALTEX REFINERIES

(Qld) Ltd

ACN 008 425 581

P.O. Box 40

Wynnum QLD 4178

Telephone: +61 7 3362 7291

Facsimile: +61 7 3362 7295

## Quality Certificate Automotive Diesel -Xtra Low Sulfur

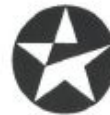

**CALTEX**

Date : 29-04-2017

Tank : D2067

Batch No: DX1568

Product Code: DXLQS

| METHOD      | TEST                                | SPECIFICATION |     | RESULT       | UNITS     |
|-------------|-------------------------------------|---------------|-----|--------------|-----------|
| ASTM D4176  | Appearance @ 25°C                   | 1             | max | 1            |           |
| ASTM D4737A | Cetane Index (Calculated)           | 46            | min | 54.0         |           |
| ASTM D5773  | Cloud Point (D2500 equivalent)      | 0             | max | 0            | deg C     |
| ASTM D1500  | Colour (ASTM)                       | 2.0           | max | L1.0         |           |
| ASTM D2624  | Conductivity                        | 80-600        |     | 455          | pS/m      |
| ASTM D2624  | Temperature at time of measurement  | Report        |     | 22.1         | deg C     |
| ASTM D130   | Copper Corrosion (3 Hrs @ 50 deg C) | 1             | max | 1a           |           |
| ASTM D4052  | Density @ 15 deg C                  | 0.820-0.850   |     | 0.8379       | kg/L      |
| ASTM D86    | 10% Recovered                       | Report        |     | 230.0        | deg C     |
| ASTM D86    | 50% Recovered                       | Report        |     | 273.0        | deg C     |
| ASTM D86    | 90% Recovered                       | Report        |     | 325.5        | deg C     |
| ASTM D86    | 95% Recovered                       | 360           | max | 339.6        | deg C     |
| ASTM D86    | FBP                                 | Report        |     | 354.4        | deg C     |
| IP 387      | Filter Blocking Tendency            | 1.41          | max | 1.01         |           |
| ASTM D93    | Flash point                         | 64.0          | min | 75.5         | deg C     |
| IP 450      | Lubricity (wsd 1.4) @ 60°C          | 0.460         | max | 0.423        | mm        |
| Declaration | Lubricity Additive - Tolad 9121     | Report        |     | 104          | mg/kg     |
| Declaration | Total Lubricity Additive content    | 300           | max | 104          | mg/kg     |
| ASTM D6591  | Aromatics                           | 15            | min | 28.7         | mass%     |
| ASTM D6591  | Polyaromatic Hydrocarbons           | 11.0          | max | 5.7          | mass%     |
| Calculated  | Stadis 450 (RDE/A621) content       | 7             | max | 1.2          | mg/L      |
| ASTM D7039  | Sulfur (Total)                      | 10            | max | 7.3          | mg/kg     |
| ASTM D2709  | Water and Sediment                  | 0.05          | max | <0.01        | vol%      |
| Declaration | Additives (other)                   | Report        |     | Nil Addition | mg/L      |
| ASTM D974   | Acid Number (Total)                 | 0.30          | max | <0.30        | mg KOH/g  |
| ASTM D482   | Ash                                 | 100           | max | <100         | mg/kg     |
| ASTM D4530  | Carbon Residue (10 % Bottoms)       | 0.20          | max | <0.2         | mass%     |
| ASTM D445   | Viscosity @ 40 deg C                | 2.0 - 4.5     |     | 2.0 to 4.5   | sq.mm/sec |
| ASTM D974   | Acid Number (Strong)                | nil           |     | Nil          | mg KOH/g  |
| ASTM D2274  | Oxidation Stability                 | 25            | max | <25          | mg/L      |

\* Based on frequency testing

# Denotes result off specification

Note 1:- Nil Bio-Diesel (FAME) has been added to this product

This fuel conforms to Australian National Fuel Standards for 2001.

All tests have been performed with the latest revision of the tests indicated. The accuracy of the test results is within the limits of precision shown in the methods.

This certificate relates specifically to the sample tested, but relates also to the entire batch in so far as the sample is drawn according to ASTM D4057.

Date testing completed : 29-04-2017

Approved Signatory :

Name :

Date : 29-04-2017

ID : 705471

## A2- GC-MS of essential oils used in oxygenated studies

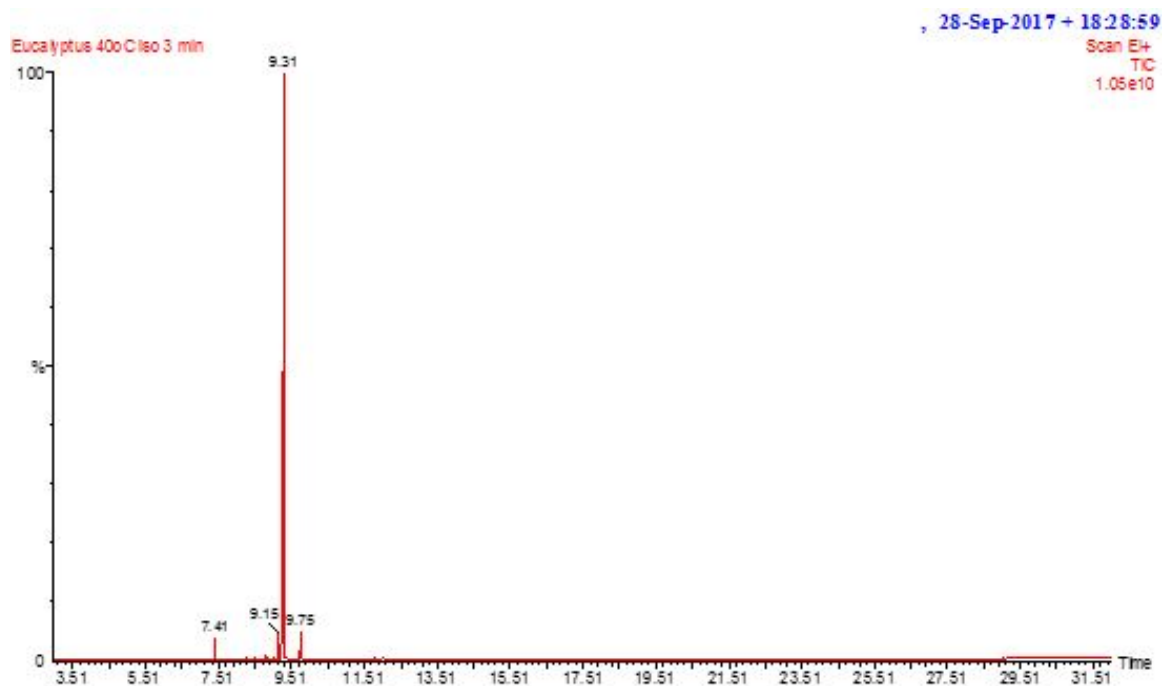

Figure A-1: GC-MS of pure eucalyptus oil-

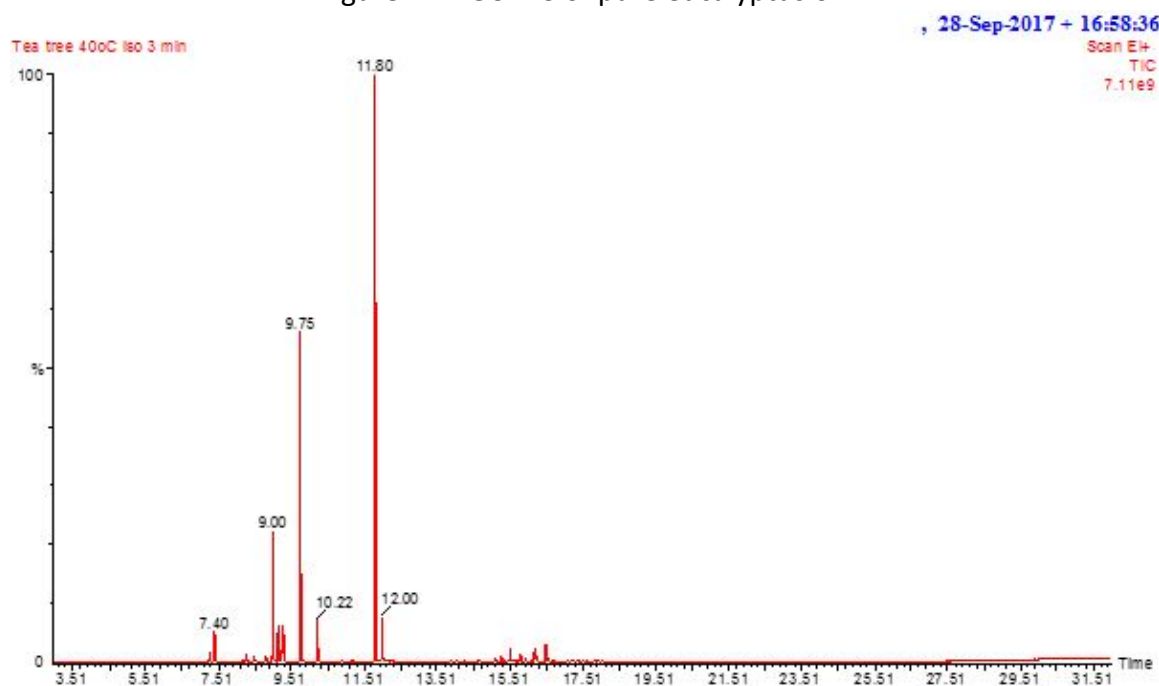

Figure A-2: GC-MS of pure tea tree oil
